1  
2 **Guiding Irregular Nuclear Morphology on Nanopillar Array for Malignancy**  
3 **Differentiation in Tumor cells**

4  
5 Yongpeng Zeng,<sup>1</sup> Yinyin Zhuang,<sup>1</sup> Aninda Mitra,<sup>1</sup> Peng Chen,<sup>1</sup> Isabella Saggio,<sup>2,3,4</sup> G. V.  
6 Shivashankar,<sup>5,6</sup> Weibo Gao,<sup>7,8</sup> Wenting Zhao<sup>1,\*</sup>

7  
8 <sup>1</sup> School of Chemical and Biomedical Engineering, Nanyang Technological University, Singapore

9 <sup>2</sup> Dipartimento di Biologia e Biotechnologie Charles Darwin, Sapienza Università di Roma, Roma,  
10 Italy

11 <sup>3</sup> School of Biological Sciences Nanyang Technological University, Singapore

12 <sup>4</sup> CNR Institute of Molecular Biology and Pathology, Rome, Italy

13 <sup>5</sup> Department of Health Sciences & Technology (D-HEST), ETH Zurich, Switzerland

14 <sup>6</sup> Paul Scherrer Institute, Villigen, Switzerland

15 <sup>7</sup> Division of Physics and Applied Physics, School of Physical and Mathematical Sciences,  
16 Nanyang Technological University, Singapore

17 <sup>8</sup> The Photonics Institute and Centre for Disruptive Photonic Technologies, Nanyang Technological  
18 University, Singapore

19  
20 \*Corresponding Authors: [wtzhao@ntu.edu.sg](mailto:wtzhao@ntu.edu.sg)

21 **Abstract**

22 For more than a century, abnormal nuclei in tumor cells, presenting subnuclear invaginations and  
23 folds on the nuclear envelope, have been known to be associated with high malignancy and poor  
24 prognosis. However, current nuclear morphology analysis focuses on the features of the entire  
25 nucleus, overlooking the malignancy-related subnuclear features in nanometer scale. The main  
26 technical challenge is to probe such tiny and randomly distributed features inside cells. We here  
27 employ nanopillar arrays to guide subnuclear features into ordered patterns enabling their  
28 quantification as a strong indicator of cell malignancy. Both breast and liver cancer cells were  
29 validated, as well as the quantification of nuclear abnormality heterogeneity. The alterations of  
30 subnuclear patterns were also explored as effective readouts for drug treatment. We envision this  
31 nanopillar-enabled quantification of subnuclear abnormal features in tumor cells opens a new angle  
32 in characterizing malignant cells and studying the unique nuclear biology in cancer.

33 **Teaser**

34 A nanopillar-based assay quantifying the abnormal nuclear morphology in tumor cells at  
35 single-cell level.

## 36 **Introduction**

37 Nuclear polymorphism is one characteristic feature widely reported across a variety of  
38 cancer types (1). However, clinical grading of tumor cell's nuclei for pathological diagnosis still  
39 largely relies on subjective visual inspection of nuclear morphology through optical microscopic  
40 imaging (2), which counts on the experience of individual pathologists and inevitably suffers from  
41 poor reproducibility and reliability (3). To address this bottleneck, a variety of technologies,  
42 including clinical sample labeling (4), computer-aided medical image processing with machine  
43 learning or artificial intelligence (5, 6), and microfabrication and micropatterning for the whole  
44 nucleus guidance (7, 8), have been explored for objective and quantitative characterization of the  
45 nuclear architecture. Nevertheless, the quantifiable parameters are mainly focused on nuclear size  
46 and circularity, uniformity of nuclear chromatin, karyoplasmic ratio, and nucleoli, etc. (5, 9); while  
47 the obvious subnuclear abnormalities including folds, invaginations, and inclusions on nuclear  
48 envelopes are only evaluated qualitatively due to their random appearance in individual nuclei and  
49 huge variations between cells. More critically, a significant technical challenge for their  
50 quantification lies in their near-diffraction-limited size (i.e. in tens to hundreds of nanometers  
51 scale), which is hard to characterize under optical microscopy.

52 To probe subcellular properties near or below diffraction-limited size scales, vertically  
53 aligned nanopillar arrays have recently been introduced as a powerful tool. They were shown to  
54 effectively interrogate plasma membrane properties at the scale of tens to hundreds of nanometers,  
55 such as altering the membrane permeability for intracellular delivery of biomolecules (10-13),  
56 performing subcellular electroporation and recording intracellular electrophysiology signals (14,  
57 15), manipulating nanoscale membrane topography to recruit endocytic proteins (16, 17) and  
58 trigger actin polymerization (18), probing cellular mechanics (19, 20), and guiding cell adhesion,  
59 migration and differentiation (21, 22). More interestingly, nanopillars have been reported to reach  
60 the nucleus in the intracellular space for probing nuclear deformability and their cytoskeleton  
61 regulators in live cells (23), altering the distribution of different lamin proteins along them (24), and  
62 rewiring the mechanotransduction from the plasma membrane to the nucleus (24). However,  
63 whether nanopillar-induced nuclear deformation correlated with the subnuclear irregularities in  
64 cancer cells and how such correlation can be used to assess cancer cell properties have not been  
65 explored before.

66 In this study, we demonstrate a quantitative characterization of subnuclear irregularity in  
67 cancer cells using vertically aligned nanopillar arrays. When plated on nanopillars, the subnuclear

68 features of cancer cells are effectively guided into ordered deformation patterns with readable  
69 anisotropy. Interestingly, the increase of anisotropy shows an obvious correlation with higher  
70 malignancy and faster cell migration. Taking advantage of the single cell resolution with multiple  
71 sampling points per nucleus, we evaluate both the heterogeneity in a cancer cell population and the  
72 differential response of anti-metastatic drugs between high and low malignant cells.

## 73 **Results**

### 74 **Nanopillar guides nuclear shape irregularities in cancer cells**

75 Differential response of subnuclear morphology to nanopillars among tumor cells with  
76 different malignancies was first evaluated (Fig. 1A). Arrays of vertically aligned nanopillars (as  
77 shown in the scanning electron micrograph (SEM) (Fig. 1B) were fabricated on transparent quartz  
78 coverslip using electron-beam lithography (EBL) and reactive ion etching (RIE). Taking breast  
79 cancer cells as a model, we examined two well-known cell lines that exhibit distinct metastatic  
80 potential, low malignant MCF-7 and high malignant MDA-MB-231 cells, on both flat and  
81 nanopillar arrays. After an overnight culture to allow sufficient generation and stabilization of  
82 deformations on nanopillars, the nuclear morphology was visualized via immunostaining of nuclear  
83 lamina protein lamin A, a key modulator of nuclear shape in pathogenesis (25). For low malignant  
84 MCF-7 cells, they display a smooth nuclear outline on flat substrates without noticeable subnuclear  
85 features (representative image shown in Fig. 1C top left panel and more examples shown in fig.  
86 S1A left column). In contrast, those cultured on nanopillar arrays generate an ordered array of  
87 lamin A rings colocalizing with nanopillar position underneath (Fig. 1C bottom left panel and fig.  
88 S1A right column), consistent with the previous report (23). In comparison, the high malignant  
89 MDA-MB-231 cells, on the flat surface, show prominent but randomly distributed subnuclear  
90 foldings and wrinkles across the nucleus, indicating altered nuclear architecture yet challenging to  
91 quantify with irregular shapes (Fig. 1C top right panel and fig. S1B left column). But when cultured  
92 on nanopillar arrays, MDA-MB-231 cells exhibit significantly decreased randomness of subnuclear  
93 irregular features. Instead, distinct alignment of subnuclear features into line patterns along  
94 adjacent nanopillars are clearly observed (Fig. 1C bottom right panel and fig. S1B right column),  
95 suggesting a remodeling of the lamin network guided by the local perturbations from nanopillars.

96 Based on the guided subnuclear features on nanopillars, a quantitative analysis of lamin A is  
97 performed to differentiate MCF-7 and MDA-MB-231 cells. One pronounced difference is the  
98 isotropy of the lamin A network generated patterns on nanopillars: the rings formed in MCF-7  
99 nuclei give isotropic distribution around nanopillars, while the lines aligned across pillar arrays in

MDA-MB-231 cells generate anisotropic intensity profile around each nanopillar with dominant distribution in certain angles. To quantitatively distinguish the isotropic and anisotropic patterns of subnuclear deformation on nanopillars, we removed the nuclear boundary and analyzed specifically the orientation distribution of the lamin A's subnuclear patterns using the OrientationJ (26) plug-in in ImageJ (27), where for each pixel, the angle that aligns dominantly with surrounding signals is calculated and displayed in color hues. The intact images with nuclear boundaries of example cells in Fig. 1C for each condition are shown in fig. S2, where the nuclear boundary of MCF-7 on a flat surface remains uncut as no subnuclear feature is detectable. As shown in Fig. 1D, the isotropic ring deformation of MCF-7 nuclei on nanopillars exhibits a broad and random angle distribution of subnuclear features and thereby generates mixed colors surrounding each nanopillar (Fig. 1D, bottom left). Similarly, the nuclear boundary of MCF-7 on the flat surface also displayed a combination of different angles in individual nuclei, and thus a variety of colors (Fig. 1D, top left). In contrast, the aligned subnuclear deformation in MDA-MB-231 on nanopillars gives rise to a preferred angle across the whole nucleus and thus displaying a prominent yellowish color (Fig. 1D, bottom right). However, such a pillar-guided nuclear pattern in high malignant MDA-MB-231 cells could not be formulated in flat surfaces, which only showed a random distribution of subnuclear groves and invaginations (Fig. 1D, top right). Here, by collecting the angle distribution inside the individual nucleus, we found that the nanopillar array produces a detectable predominant angle for the anisotropic subnuclear deformation in high malignant MDA-MB-231 cells. In contrast, no dominant subnuclear orientation is observed in the low malignant MCF-7 nucleus (Fig. 1E).

For quantitative evaluation of deformation orientations, the anisotropy of the subnuclear features on each nanopillar is further converted into orientation coherency values (i.e., pillar coherency, or p.c. in short), which is ranging from 0 to 1 with 0 representing a completely isotropic pattern (e.g. perfect circle) and 1 refers to an extremely anisotropic pattern (e.g. straight line). Low malignant MCF-7 cells have much lower coherency value (p.c.= $0.27 \pm 0.18$ , n=94 pillars) than high malignant MDA-MB-231 cells (p.c.= $0.42 \pm 0.13$ , n=44 pillars) (Fig. 1F). By averaging the p.c. values of the same cell, we can further obtain an averaged cell coherency value (in short as c.c.) as a single cell readout for cell population analysis. Based on the statistics on individual pillars, we set a coherency value of 0.3 as the threshold to distinguish isotropic and anisotropic subnuclear features in this study. Not surprisingly, MCF-7 contains a higher fraction of ring-deformation cells (c.c. < 0.3, fraction= $0.74 \pm 0.13$ , n=39 cells) while MDA-MB-231 sample mainly contains line-deformation cells (c.c. > 0.3, fraction= $0.90 \pm 0.11$ , n=24 cells), as shown in Fig. 1G. It is interesting to note that both low-malignant MCF-7 cells and high-malignant MDA-MB-231 cells

133 contain a mixed population of low c.c. and high c.c. cells, indicating a possible heterogeneity of  
134 cancer nuclear properties even within the same cell type. In addition, we validate such  
135 nanopillar-guided nuclear deformation in two typical liver cancer cells with divergent invasiveness,  
136 highly invasive SK-HEP-1 and non-invasive PLC-PRF-5 (28). By wound healing assay, we found  
137 that invasive SK-HEP-1 cells migrated faster than the non-invasive PLC-PRF-5 cells (fig. S3A).  
138 Interestingly, when both cell lines were cultured on nanopillar arrays, invasive SK-HEP-1 cells  
139 displayed anisotropic line patterns formed in the nuclei, whereas non-invasive PLC-PRF-5 cells  
140 exhibited isotropic ring patterns on nanopillar arrays (fig. S3B). The distribution of their p.c. values  
141 shows significant difference between these two cell lines (fig. S3C), and the c.c. values effectively  
142 differentiate the two cell lines apart (fig. S3D). Taken together, these results confirmed that  
143 nanopillar arrays can effectively guide subnuclear morphological irregularities in tumor cells and  
144 can generate quantifiable subnuclear readouts for cell malignancy evaluation with single-cell  
145 resolution.

146 In addition, the dynamics of such subnuclear features on nanopillar are further examined in  
147 live cells via transient expression of nuclear envelope protein, LAP2 $\square$  fused with green fluorescent  
148 protein (LAP2 $\square$ -GFP). Strikingly, subnuclear rings in MCF-7 cells are relatively stable on each  
149 nanopillar location over 1 hour regardless of the overall movement of the whole nucleus (Fig. 1H  
150 upper row), while aligned line patterns of LAP2 $\square$ -GFP in MDA-MB-231 cells are able to switch  
151 among nearby nanopillar sites following the migration of nucleus (Fig. 1H lower row). It confirms  
152 that nanopillars provide persistent guidance on subnuclear deformations and serve as stable  
153 sampling points for subnuclear irregularity measurement.

### 154 **Probe cancer heterogeneity via guided nuclear deformation**

155 Heterogeneity among cancer cells presents one of the major hurdles in cancer therapy, as  
156 cancer metastasis or drug resistance are often observed only in a subset of cells with higher  
157 malignancies (29). Taking the advantages of the single-cell resolution of this nanopillar-based  
158 nucleus grading system, we were motivated to verify its accuracy in characterizing the  
159 heterogeneity of nuclear irregularity in a mixed cell population. First, we generate a series of cell  
160 mixtures containing cancer cells of different malignancies by mixing GFP-CAAX tagged low  
161 malignant MCF-7 cells with unlabeled high malignant MDA-MB-231 cells in predefined ratios  
162 (illustrated in Fig. 2A). A typical microscopy image of a cell mixture containing both cell types on  
163 nanopillar arrays is shown in Fig. 2B, where both line deformation in an unlabeled  
164 MDA-MB-231 cell and ring deformation in GFP labeled MCF-7 cells were observed. When

165 plotting the fraction of cells with high deformation coherency ( $>0.3$ ) on nanopillars against the ratio  
166 of unlabeled MDA-MB-231 in the cell mixture, we observed a positive correlation between  
167 nanopillar-measured fraction and the portion of high malignant MDA-MB-231 cells in the mixture  
168 (Fig. 2C). It indicates that cancer cells in heterogeneous malignancy can be sorted and  
169 quantitatively characterized via the nanopillar-guided subnuclear deformation patterns.

170 In addition, nanopillar-remodeled lamin A patterns are also strongly correlated with cell  
171 migration speed, another key indicator of malignant cells. Cell motility of individual cells obtained  
172 from live-cell imaging was correlated with their subnuclear deformation patterns on nanopillars for  
173 both MCF-7 and MDA-MB-231 cells (Fig. 2D). When pooling together both cells with same  
174 nanopillar-remodeled patterns (ring or line separately), we found that lamin A patterns are  
175 correlated with cell migration speed by having ring-formation in slow-migrating cells and  
176 line-forming within fast-migrating cells despite their cell types, which are clearly shown in cell  
177 migration trajectories (Fig. 2E), mean square displacement (MSD) (Fig. 2F), and calculated cell  
178 migration rate (Fig. 2G). More interestingly, even among all the low malignant MCF-7 cells, two  
179 subpopulations with distinct migrating speed can be differentiated based on nanopillar-guided  
180 lamin A patterns (Fig. 2, H-J, and fig. S4). MCF-7 cells with line deformation migrate faster than  
181 MCF-7 cells with ring patterns on nanopillars, as similarly measured by longer migration  
182 trajectories (Fig. 2H), larger mean square displacement (MSD) (Fig. 2I), and faster cell migration  
183 rate (Fig. 2J). It is plausible to speculate that the polarized contractility in fast migrating cells  
184 contribute to the high coherency of aligned lamin A patterns. Altogether, the nanostructured  
185 platform constitutes an effective technology for probing the heterogeneity in a cancer cell  
186 population with single cell resolution.

### 187 **Evaluate anti-metastatic drug effect via guided nuclear deformation**

188 Given the ability to identify and characterize high malignant or fast migrating cancer cells in  
189 a mixed cell population, we next sought to use the established nanopillar sensing system to evaluate  
190 anti-metastatic drugs. More than 90 percent of cancer mortality is caused by cancer metastasis (30).  
191 Identifying and developing ant-cancer drugs, particularly those specifically targeting  
192 metastasis-prone cells, is an emerging route for new cancer therapy (31). However, the  
193 development of anti-metastasis drugs is a daunting yet challenging task as metastasis only develops  
194 from a subset of cells and is difficult to evaluate using conventional methods probing the whole cell  
195 population, such as western blot, transwell migration, and matrigel invasion assays (32). In  
196 comparison, nanopillar-guided subnuclear deformation effectively identifies high malignant or fast



197 migrating cancer cells with single-cell resolution through lamin A line pattern. Therefore, we  
198 hypothesize that the conversion of line patterns of high malignant cells in response to drug  
199 treatment can be used to evaluate drug effectiveness against metastasis (as illustrated in Fig. 3A).  
200 As a proof of concept, we examined a reported anti-metastatic drug, curcumin (33, 34), and  
201 compared the deformation changes of MCF-7 and MDA-MB-231 on nanopillars in response to it.  
202 As shown in Fig. 3B, the high-malignant MDA-MB-231 cells exhibited significantly less line  
203 deformation, while low-malignant MCF7 showed no significant pattern changes. Upon  
204 quantification, both decreased pillar coherency values (DMSO,  $0.42 \pm 0.13$ , n=34 pillars; curcumin,  
205  $0.24 \pm 0.16$ , n=52 pillars) (Fig. 3C) and decreased fractions of line-deformation cells (DMSO,  $0.93$   
206  $\pm 0.12$ , n=27 cells; curcumin,  $0.26 \pm 0.27$ , n=30 cells) (Fig. 3D) are observed for MDA-MB-231  
207 after curcumin treatment. No significant change in the anisotropy of induced nuclear deformation is  
208 found in MCF-7 cells (Fig. 3, C and D). Consistently, MCF-7 cells do not show significant changes  
209 in migration speed (p value=0.7440) in response to the curcumin treatment, while MDA-MB-231  
210 cells exhibit a lower migration rate (p value=0.0363) (Fig. 3, E and F) after the same treatment.  
211 Concentration dependency was further characterized, where both the pillar coherency value and  
212 fraction of line-deformation cells responded sensitively to as low as 1  $\mu$ M (fig. S5). Besides  
213 curcumin, we also evaluated another reported anti-metastatic drug, haloperidol (35), and obtained  
214 similar responses as shown in fig. S6, which further validated that the anisotropy of  
215 nanopillar-guided subnuclear deformation can be an effective indicator for anti-metastatic drug  
216 evaluation.

## 217 **Discussion**

218 Nuclear deformation on nanopillars have been reported earlier in terms of the nuclear  
219 stiffness-correlated deformation depth (23) and the local indentation-induced redistribution of  
220 lamin proteins (24). However, the reorganization of nuclear morphology, especially the  
221 pathologically related subnuclear irregular features, have been overlooked. Our study here  
222 demonstrates that, using optimized nanopillar designs, we can effectively guide the subnuclear  
223 irregularities into quantifiable patterns reflecting the cell migration ability needed for cancer  
224 metastasis. It enables quantitative evaluation of the heterogeneity in a given cell mixture and the  
225 cellular response to anti-metastatic drugs, both with single-cell resolution. This establishes an  
226 effective strategy to apply nanopillar-based technologies for cancer detection.

227 It is well known that the nuclear lamina formed by lamin proteins is mechanically sensitive.  
228 The extracellular forces can induce differential distribution of lamin A and B as observed in both



229 micropipette aspiration (36, 37) and nanoneedle perturbations (24). While intracellularly,  
230 cytoskeleton-induced nuclear membrane tension has been shown to alter the conformation of lamin  
231 A/C (38). In the case of nanopillars used here, it not only delivers external force to the nuclear  
232 lamina, but also triggers membrane curvature-mediated actin polymerization locally as reported  
233 earlier (18). Therefore, the nanopillar platform offers a unique platform to tune the subnuclear  
234 pattern of lamin A using different designs of nanopillar geometry. In addition, the formation of  
235 isotropic rings or anisotropic lines on nanopillar-deformed cancer nuclei also suggests a  
236 coordination of lamin network between adjacent nanopillars. Whether or how it correlated with  
237 tumorigenesis and cancer metastasis deserves further studies.

238 Alterations in both cell migration and nuclear mechanics have been found to closely  
239 correlate with cancer progression, (39, 40) but how they are correlated with each other is unclear.  
240 Recent studies showed that unfolding of nuclear grooves and invaginations correlates with the  
241 enhanced cellular contractility via nuclear membrane tension and in turn strongly accelerates cell  
242 migration under whole cell compression (41, 42). Similarly, we also observed that aligned  
243 subnuclear deformation correlated to increased cell migration speed. However, different from the  
244 nuclear unfolding with global compression on the entire nucleus, the alignment of subnuclear  
245 features on nanopillars are persisting but dynamically adopting different nanopillars along with cell  
246 movement. It suggests a different regulation mechanism underlying the local nuclear mechanics in  
247 response to cell migration.

248 The nanopillar assay described in this study enables a quantitative characterization of  
249 subnuclear deformation in cancer cells. However, the mechanism of generating subnuclear feature  
250 during cancer development is still unknown, which inevitably hinders our interpretation of the  
251 nanopillar-induced subnuclear patterns. An in-depth molecular understanding of how such  
252 irregularities evolve and whether they associate with specific genetic or metabolic alterations will  
253 greatly enrich the nanopillar-based readouts. Moreover, due to the huge morphological variations  
254 of cell nuclei among different cancer types (1), the nanopillar dimension optimized in this work  
255 may need to be re-evaluated with other cancer types.

## 256 **Materials and Methods**

### 257 **Fabrication and characterization of nanopillar arrays**

258 Nanopillar arrays were fabricated on the quartz chip using electron-beam lithography (EBL) and  
259 reactive ion etching (RIE). The quartz chip was cleaned with acetone and isopropyl alcohol and

260 then spin-coated with 300 nm polymethylmethacrylate (PMMA) (MicroChem), followed by  
261 coating of one thin conductive layer, AR-PC 5090.02 (Allresist). Designed nanoscale patterns were  
262 written on the PMMA layer by electron-beam lithography (FEI Helios NanoLab 650) and the  
263 PMMA on the exposed areas was subsequently removed in the 3:1  
264 isopropanol:methylisobutylketone solution. A Cr mask with 80 nm thickness was formed via  
265 thermal evaporation (UNIVEX 250 Benchtop), followed by lift-off with acetone. Nanopillars were  
266 finally revealed after reactive ion etching with a mixture of CF<sub>4</sub> and CHF<sub>3</sub> (Oxford Plasmalab 80).  
267 Characterization of nanopillar dimension was performed using SEM (FEI Helios NanoLab 650)  
268 after 10 nm chromium coating.

### 269 **Cell culture and drug treatment**

270 Prior to cell culture, the nanostructured chips were cleaned by air plasma for 10 min and exposed to  
271 UV for 15 min. Subsequently, the nanostructured substrates were coated with fibronectin (2 $\mu$ g/ml,  
272 Sigma-Aldrich) for 30 minutes at 37°C. After coating, cell culture was performed on the substrates.  
273 All the cell lines used in this work were maintained in the Dulbecco's Modified Eagle Medium  
274 (DMEM) (Gibco) supplemented with 10% fetal bovine serum (FBS) (Life Technologies) and 1%  
275 Penicillin-Streptomycin (Life Technologies) in a standard incubator at 37°C with 5% CO<sub>2</sub>. After  
276 overnight incubation and the nuclear deformation was stabilized, the MCF-7 and MDA-MB-231  
277 cells on nanostructures are treated with curcumin (Sigma) or DMSO (Sigma). After 24-hour  
278 incubation, the treated cells and untreated cells were fixed with 4% Paraformaldehyde (PFA)  
279 Solution in PBS (Boster biological technology AR1068) for 15 minutes for subsequent  
280 immunostaining.

### 281 **Immunofluorescence staining**

282 Cells cultured on nanopillar arrays were immunostained for lamin A or lamin B1. Cells were  
283 washed with pre-warmed PBS two times and fixed with 4% paraformaldehyde (PFA) in  
284 phosphate-buffered saline (PBS) (Boster biological technology AR1068) for 15 minutes. The cells  
285 were washed three times with PBS and then permeabilized with 0.5% Triton X-100 (Sigma) in PBS  
286 for 15 minutes. After washing with PBS for three times, samples were blocked using 5% bovine  
287 serum albumin (BSA) (Sigma) in PBS for 1 hour before staining with 1:400 anti-lamin A (Abcam  
288 ab26300) and anti-lamin B1 (gift from the Saggio lab in Sapienza University of Rome). Samples  
289 were washed three times with PBS and stained with the secondary antibody, Chicken anti-Rabbit

290 IgG (H+L) Cross-Adsorbed Secondary Antibody, Alexa Fluor 488 (Invitrogen A21441), 1:500 in  
291 staining buffer for 1 hour under room temperature.

## 292 **Confocal imaging and live cell tracking**

293 Imaging of the fluorescently labeled cells on nanopillar arrays was performed using laser scanning  
294 confocal microscopy (Zeiss LSM 800 with Airyscan). In particular, a Plan-Apochromat 100x/1.4  
295 oil objective was used. During imaging, fixed cells were maintained in PBS. Z stack images were  
296 acquired with 500 nm distance between each frame. Live cell imaging and the subsequent  
297 fluorescence imaging was performed using a spinning disc confocal microscope (SDC) that is built  
298 around a Nikon Ti2 inverted microscope equipped with a Yokogawa CSU-W1 confocal spinning  
299 head, a Plan-Apo objective (100x1.45-NA), a back-illuminated sCMOS camera (Orca-Fusion;  
300 Hamamatsu). Excitation light was provided by 488-nm/150mW (Vortran) (for GFP), and all image  
301 acquisition and processing were controlled by MetaMorph (Molecular Device) software. The  
302 migration of individual cells was manually tracked using imageJ, and their migratory behavior was  
303 characterized using the method developed by a previous work (43).

## 304 **Transfection**

305 For plasmid transfection in cancer cells, 1  $\mu$ g plasmid was mixed with 1.5  $\mu$ l Lipofectamine 3000  
306 (Life Technologies) and 2  $\mu$ l P3000 reagent (Life Technologies) in Opti-MEM (Gibco) and  
307 incubated for 20 mins at room temperature. Before the addition of the transfection mixture, cancer  
308 cells were starved with the Opti-MEM (Gibco) medium for 30 mins at 37°C. After 4 hours of  
309 incubation, the Opti-MEM (Gibco) medium was replaced with regular culture medium and the cells  
310 were allowed to recover overnight before cell sorting or live cell imaging.

## 311 **Fluorescence-activated cell sorting**

312 Cells were sorted by using the BD FACS Aria II, and gating was done using the BD FACSDiva™  
313 software (Becton, Dickinson Biosciences). Dead cells were excluded from analysis on the basis of  
314 FSC/SSC; cell aggregates or small debris were excluded from analysis on the basis of side scatter  
315 (measuring cell granularity) and forward scatter (measuring cell size); lastly, GFP positive cells  
316 were sorted on the basis of fluorescence intensity.

## 317 **Wound healing assay**

318 Cells were maintained in 35 mm dishes for each cell line until approximately 90% confluent.  
319 Scratch was made in the confluent monolayer of cells with a sterile 200- $\mu$ l pipette tip, and fresh  
320 culture medium was replaced. Brightfield microscopic pictures were taken of the same field at 24  
321 hours. Migration rate was measured by quantifying the closure area within the same time frame  
322 using ImageJ.

### 323 **Statistical analysis**

324 Welch's t tests (unpaired, 2 tailed, not assuming equal SD) were used to evaluate the significance.  
325 All tests were performed using Prism (GraphPad Software). Data are presented as mean  $\pm$  SEM or  
326 mean  $\pm$  SD as stated in the figure captions. All experiments were repeated at least twice, unless  
327 otherwise explicitly stated in the figure captions.

## References

1. D. Zink, A. H. Fischer, J. A. Nickerson, Nuclear structure in cancer cells. *Nature Reviews Cancer* **4**, 677-687 (2004).
2. J. I. de Las Heras, E. C. Schirmer, The nuclear envelope and cancer: a diagnostic perspective and historical overview. *Advances in experimental medicine and biology* **773**, 5-26 (2014).
3. J. P. Sloane *et al.*, Consistency achieved by 23 European pathologists from 12 countries in diagnosing breast disease and reporting prognostic features of carcinomas. European Commission Working Group on Breast Screening Pathology. *Virchows Archiv : an international journal of pathology* **434**, 3-10 (1999).
4. G. Bussolati *et al.*, "To be or not to be in a good shape": diagnostic and clinical value of nuclear shape irregularities in thyroid and breast cancer. *Advances in experimental medicine and biology* **773**, 101-121 (2014).
5. A. Das, M. S. Nair, S. D. Peter, Computer-Aided Histopathological Image Analysis Techniques for Automated Nuclear Atypia Scoring of Breast Cancer: a Review. *Journal of digital imaging* **33**, 1091-1121 (2020).
6. A. Radhakrishnan, K. Damodaran, A. C. Soylemezoglu, C. Uhler, G. V. Shivashankar, Machine Learning for Nuclear Mechano-Morphometric Biomarkers in Cancer Diagnosis. *Scientific Reports* **7**, 17946 (2017).
7. Z. Pan *et al.*, Control of cell nucleus shapes via micropillar patterns. *Biomaterials* **33**, 1730-1735 (2012).
8. F. Badique *et al.*, Directing nuclear deformation on micropillared surfaces by substrate geometry and cytoskeleton organization. *Biomaterials* **34**, 2991-3001 (2013).
9. G. Kristiansen, Next-generation nuclear morphology to grade solid tumours. *The Lancet Oncology* **19**, 275-277 (2018).
10. C. Chiappini *et al.*, Biodegradable silicon nanoneedles delivering nucleic acids intracellularly induce localized in vivo neovascularization. *Nature Materials* **14**, 532-539 (2015).
11. R. Elnathan *et al.*, Maximizing Transfection Efficiency of Vertically Aligned Silicon Nanowire Arrays. *Advanced Functional Materials* **25**, 7215-7225 (2015).
12. J. J. VanDersarl, A. M. Xu, N. A. Melosh, Nanostraws for direct fluidic intracellular access. *Nano letters* **12**, 3881-3886 (2012).
13. A. K. Shalek *et al.*, Vertical silicon nanowires as a universal platform for delivering biomolecules into living cells. **107**, 1870-1875 (2010).
14. C. Xie, Z. Lin, L. Hanson, Y. Cui, B. Cui, Intracellular recording of action potentials by nanopillar electroporation. *Nature Nanotechnology* **7**, 185-190 (2012).
15. X. Duan, T. M. Fu, J. Liu, C. M. Lieber, Nanoelectronics-biology frontier: From nanoscopic probes for action potential recording in live cells to three-dimensional cyborg tissues. *Nano today* **8**, 351-373 (2013).
16. W. Zhao *et al.*, Nanoscale manipulation of membrane curvature for probing endocytosis in live cells. *Nature Nanotechnology* **12**, 750-756 (2017).
17. H. Y. Lou, W. Zhao, Y. Zeng, B. Cui, The Role of Membrane Curvature in Nanoscale Topography-Induced Intracellular Signaling. *Accounts of chemical research* **51**, 1046-1053 (2018).
18. H.-Y. Lou *et al.*, Membrane curvature underlies actin reorganization in response to nanoscale surface topography. **116**, 23143-23151 (2019).
19. J. L. Tan *et al.*, Cells lying on a bed of microneedles: An approach to isolate mechanical force. **100**, 1484-1489 (2003).
20. J.-Y. Shiu, L. Aires, Z. Lin, V. Vogel, Nanopillar force measurements reveal actin-cap-mediated YAP mechanotransduction. *Nature Cell Biology* **20**, 262-271 (2018).

- 378 21. B. K. K. Teo *et al.*, Nanotopography Modulates Mechanotransduction of Stem Cells and  
379 Induces Differentiation through Focal Adhesion Kinase. *ACS Nano* **7**, 4785-4798 (2013).
- 380 22. S. Bonde *et al.*, Tuning InAs Nanowire Density for HEK293 Cell Viability, Adhesion, and  
381 Morphology: Perspectives for Nanowire-Based Biosensors. *ACS Applied Materials &*  
382 *Interfaces* **5**, 10510-10519 (2013).
- 383 23. L. Hanson *et al.*, Vertical nanopillars for in situ probing of nuclear mechanics in adherent  
384 cells. *Nat Nanotechnol* **10**, 554-562 (2015).
- 385 24. C. S. Hansel *et al.*, Nanoneedle-Mediated Stimulation of Cell Mechanotransduction  
386 Machinery. *ACS Nano* **13**, 2913-2926 (2019).
- 387 25. P. Isermann, J. Lammerding, Nuclear mechanics and mechanotransduction in health and  
388 disease. *Current biology : CB* **23**, R1113-1121 (2013).
- 389 26. E. Fonck *et al.*, Effect of aging on elastin functionality in human cerebral arteries. *Stroke* **40**,  
390 2552-2556 (2009).
- 391 27. J. Schindelin *et al.*, Fiji: an open-source platform for biological-image analysis. *Nature*  
392 *Methods* **9**, 676-682 (2012).
- 393 28. B. Rani *et al.*, Galunisertib suppresses the staminal phenotype in hepatocellular carcinoma  
394 by modulating CD44 expression. *Cell Death & Disease* **9**, 373 (2018).
- 395 29. I. Dagogo-Jack, A. T. Shaw, Tumour heterogeneity and resistance to cancer therapies.  
396 *Nature reviews. Clinical oncology* **15**, 81-94 (2018).
- 397 30. C. L. Chaffer, R. A. Weinberg, A perspective on cancer cell metastasis. *Science (New York,*  
398 *N.Y.)* **331**, 1559-1564 (2011).
- 399 31. R. L. Anderson *et al.*, A framework for the development of effective anti-metastatic agents.  
400 *Nature Reviews Clinical Oncology* **16**, 185-204 (2019).
- 401 32. A. Valster *et al.*, Cell migration and invasion assays. *Methods (San Diego, Calif.)* **37**,  
402 208-215 (2005).
- 403 33. L. G. Menon, R. Kuttan, G. Kuttan, Anti-metastatic activity of curcumin and catechin.  
404 *Cancer letters* **141**, 159-165 (1999).
- 405 34. R. A. Sharma *et al.*, Pharmacodynamic and pharmacokinetic study of oral Curcuma extract  
406 in patients with colorectal cancer. *Clinical cancer research : an official journal of the*  
407 *American Association for Cancer Research* **7**, 1894-1900 (2001).
- 408 35. W. Zhao *et al.*, Candidate Antimetastasis Drugs Suppress the Metastatic Capacity of Breast  
409 Cancer Cells by Reducing Membrane Fluidity. *Cancer research* **76**, 2037-2049 (2016).
- 410 36. J. D. Pajerowski, K. N. Dahl, F. L. Zhong, P. J. Sannak, D. E. Discher, Physical plasticity  
411 of the nucleus in stem cell differentiation. **104**, 15619-15624 (2007).
- 412 37. Y. Xia *et al.*, Rescue of DNA damage after constricted migration reveals a  
413 mechano-regulated threshold for cell cycle. *Journal of Cell Biology* **218**, 2545-2563 (2019).
- 414 38. T. O. Ihalainen *et al.*, Differential basal-to-apical accessibility of lamin A/C epitopes in the  
415 nuclear lamina regulated by changes in cytoskeletal tension. *Nature Materials* **14**,  
416 1252-1261 (2015).
- 417 39. C. Denais, J. Lammerding, Nuclear mechanics in cancer. *Advances in experimental*  
418 *medicine and biology* **773**, 435-470 (2014).
- 419 40. C. H. Stuelten, C. A. Parent, D. J. Montell, Cell motility in cancer invasion and metastasis:  
420 insights from simple model organisms. *Nature Reviews Cancer* **18**, 296-312 (2018).
- 421 41. A. J. Lomakin *et al.*, The nucleus acts as a ruler tailoring cell responses to spatial  
422 constraints. *Science (New York, N.Y.)* **370**, (2020).
- 423 42. V. Venturini *et al.*, The nucleus measures shape changes for cellular proprioception to  
424 control dynamic cell behavior. *Science (New York, N.Y.)* **370**, (2020).
- 425 43. P. H. Wu, A. Giri, D. Wirtz, Statistical analysis of cell migration in 3D using the anisotropic  
426 persistent random walk model. *Nature protocols* **10**, 517-527 (2015).
- 427



428 **Acknowledgments**

429 **Funding:** This work is supported by the Singapore Ministry of Education (MOE) (W. Zhao,  
430 RG145/18, RG112/20, and MOE-MOET32020-0001), the Singapore National Research  
431 Foundation (W. Zhao, NRF2019-NRF-ISF003-3292), the NTU Start-up Grant (W. Zhao),  
432 NTU-NNI Neurotechnology Fellowship (W. Zhao), and AIRC IG-24614 and Sapienza  
433 AR1181642EE61111 (I. Saggio).

434 **Author contribution:** Y.P.Z. and W.Z. conceived the idea and designed the experiments. Y.P.Z.  
435 and Y.Y.Z. performed most of the experiments and data analysis. Y.P.Z. and W.G. performed  
436 fabrication and SEM experiments. P.C., I.S. and G.V.S. provided material and experimental  
437 supports. Y.P.Z. and W.Z. drafted the manuscript. W.G., P.C., I.S. and G.V.S. edited the  
438 manuscript. All of the authors discussed and commented on the manuscript.

439 **Competing interests:** Y.P.Z., A.M. and W.Z. are inventors on a pending patent related to this  
440 work filed by Nanyang Technological University (no. PCT/SG2021/050687, filed on 10  
441 November 2021). The authors declare that they have no other competing interests.

442 **Data and materials availability:** All data needed to evaluate the conclusions in the paper are  
443 present in the paper and/or the Supplementary Materials.



444

## Figures and Tables

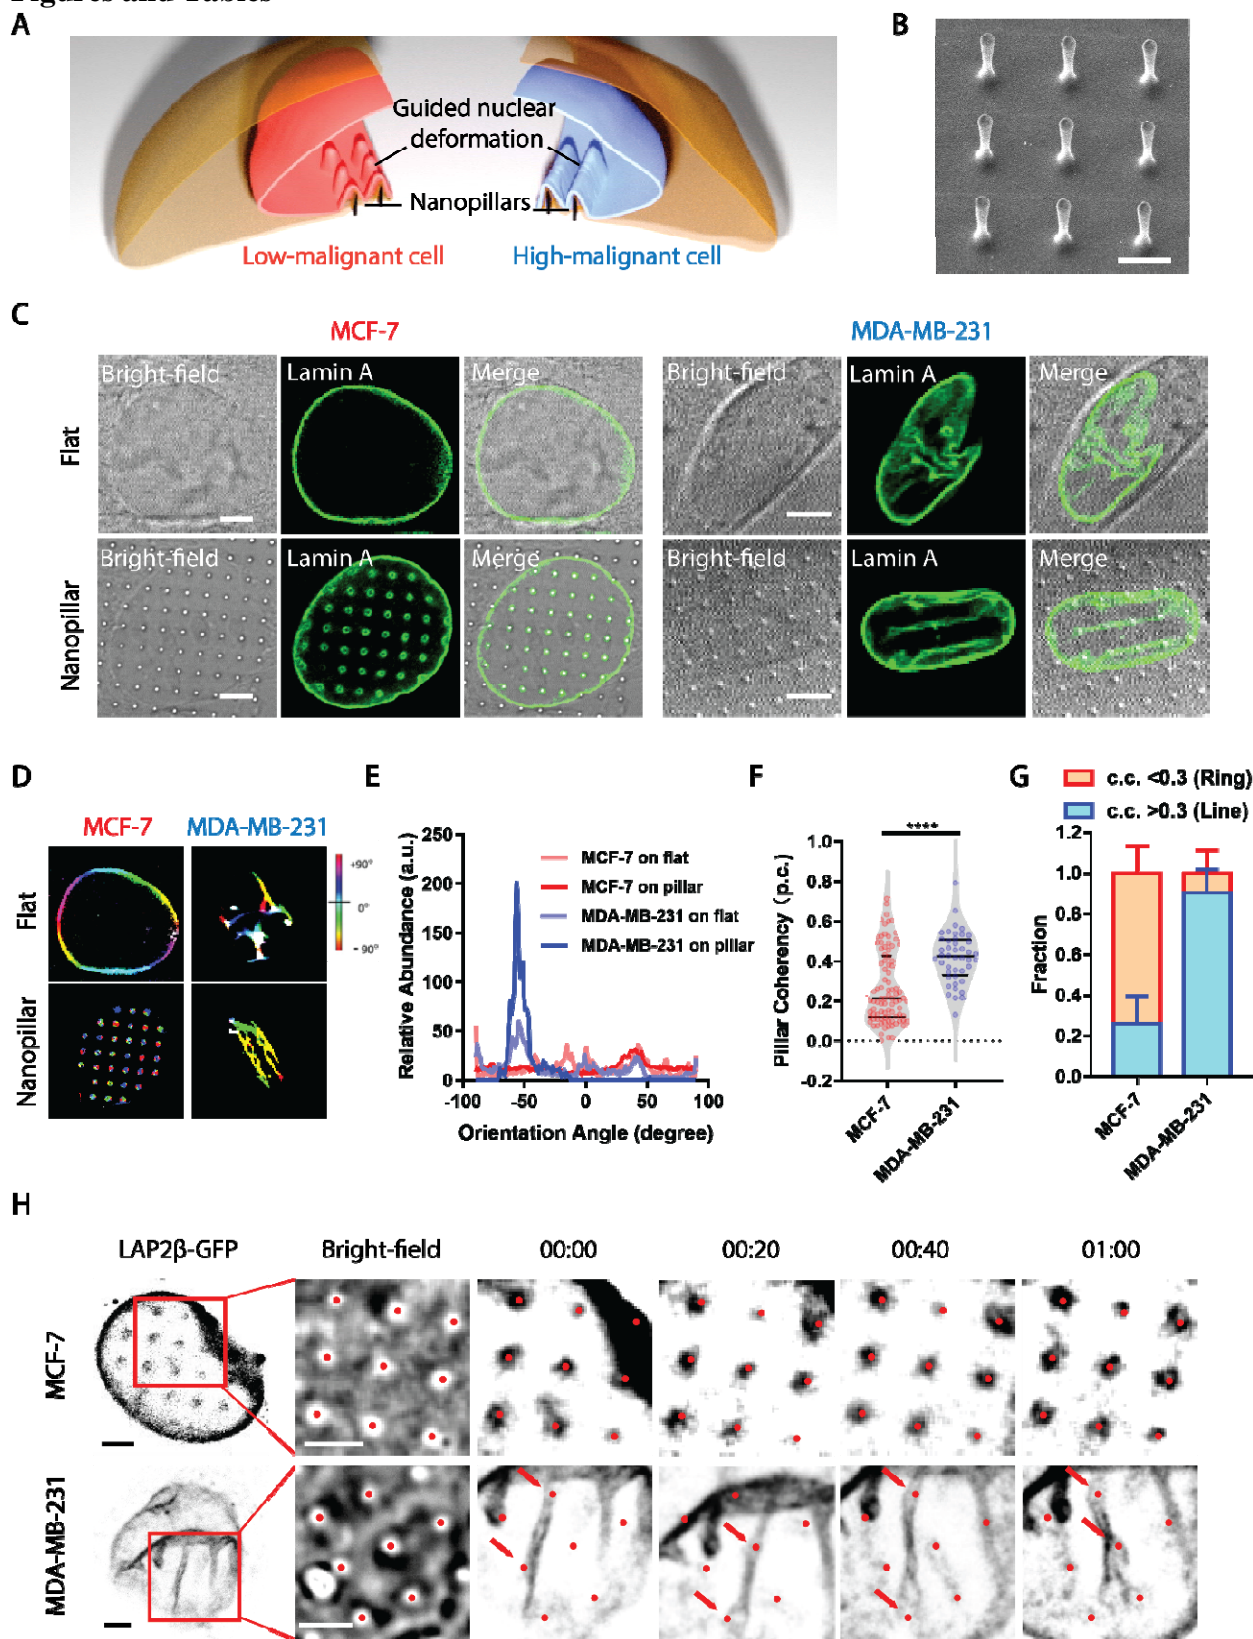

445

446

447

448

449

450

**Figure 1. Nanopillar-guided subnuclear deformation patterns correlate with cancer malignancy.** (A) Schematics of different patterns generated by nanopillar-guided nuclear shape deformation in cancer cells with varying malignancies. (B) SEM of nanopillar arrays. Scale bar, 2  $\mu\text{m}$ . (C) Nuclear morphology of MCF-7 cells and MDA-MB-231 cells on a flat surface. Scale bars, 5  $\mu\text{m}$ . (D) Orientation of nuclear shape irregularities and nanopillar-guided nuclear features

451 in MDA-MB-231 cells and MCF-7 cells. **(E)** Comparison of orientation distribution of nuclear  
452 shape irregularities and nanopillar-guided nuclear features in MDA-MB-231 cells and MCF-7  
453 cells. **(F)** Anisotropy measurement of the nanopillar-guided nuclear deformation in MCF-7 cells  
454 ( $N = 94$  pillars) and MDA-MB-231 cells ( $N = 44$  pillars). **(G)** Fraction of ring deformation and  
455 line deformation in MCF-7 cells ( $N = 39$  cells) and MDA-MB-231 cells ( $N = 24$  cells). Ring  
456 deformation is defined by  $c.c. < 0.3$  whereas ring deformation is defined by  $c.c. > 0.3$ . **(H)**  
457 Dynamics of nanopillar-guided nuclear features in MCF-7 and MDA-MB-231 cells for one hour.  
458 Red dots indicate nanopillar locations. Red arrows in the bottom row refer to the nanopillars that  
459 guide the nuclear grooves. Scale bars,  $3 \mu\text{m}$ . Statistical significance of the two groups was  
460 compared using an unpaired t test with Welch's correction, p-value: \*\*\*\* $<0.0001$ .

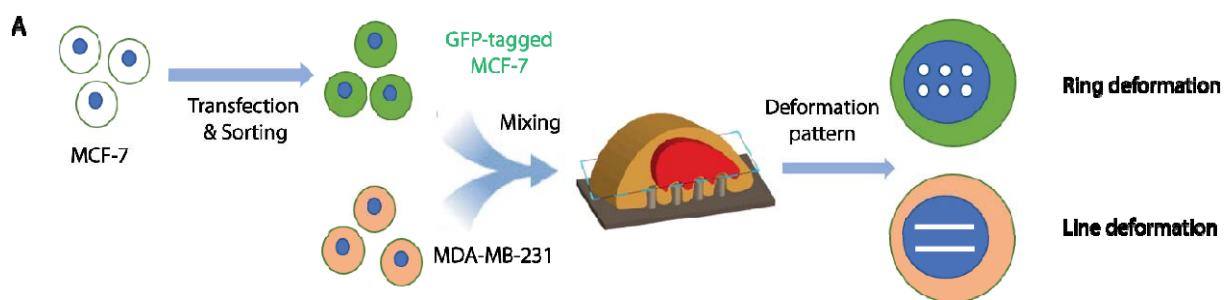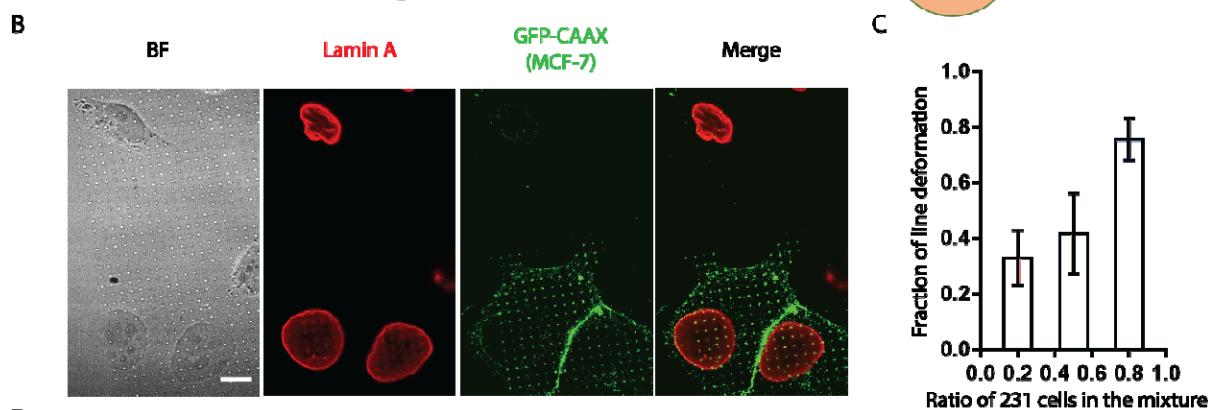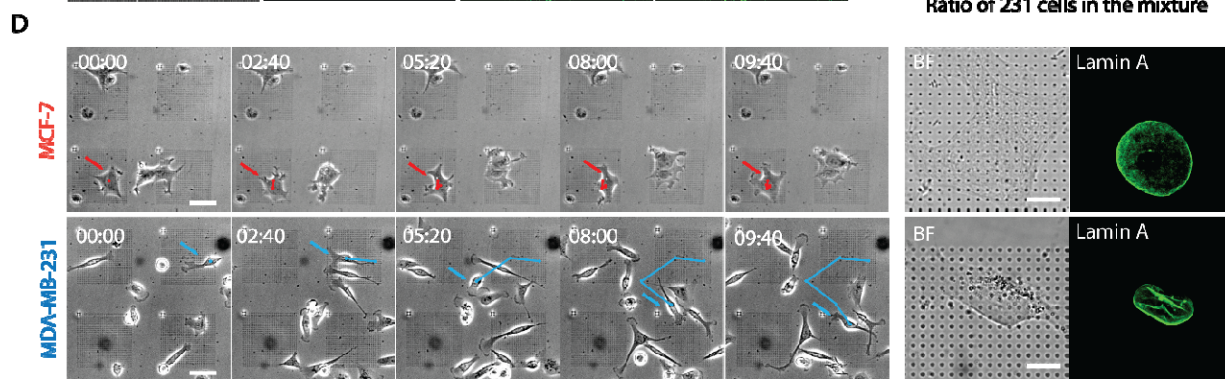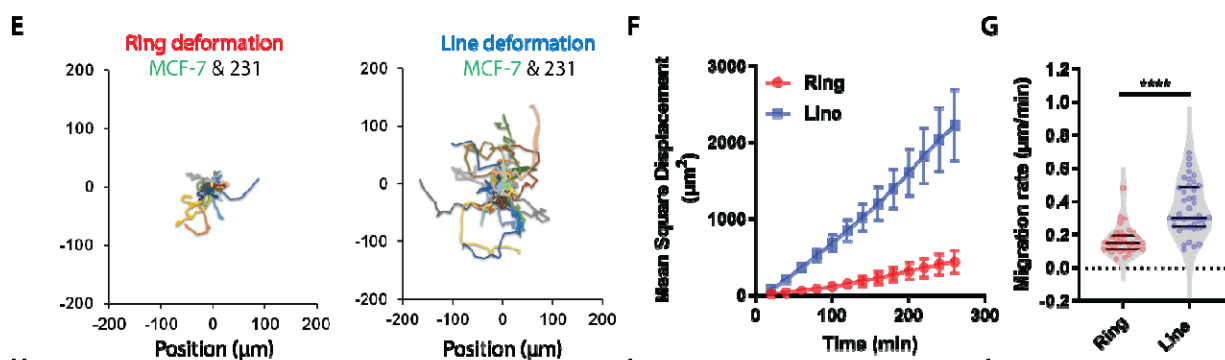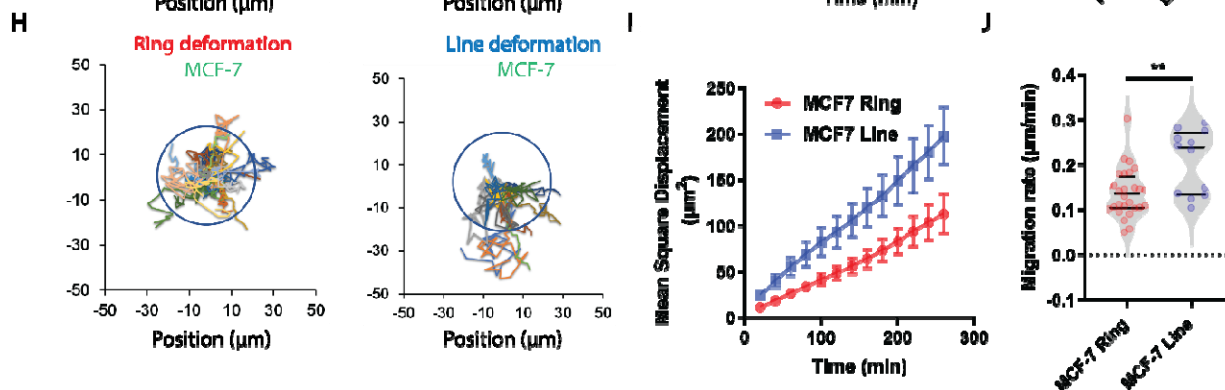

462 **Figure 2. Probing cancer heterogeneity via nanopillar-induced subnuclear deformation. (A)**  
463 Methodology for using nanopillar arrays to probe cancer heterogeneity. **(B)** MDA-MB-231 cell  
464 and GFP-tagged MCF-7 cells showing different nuclear deformation patterns on the same  
465 substrate. Scale bar 10  $\mu\text{m}$ . **(C)** Correlation between fraction of cells showing line-like guided  
466 nuclear deformation and the ratio of MDA-MB-231 cells to MCF-7 cells. **(D)** Brightfield images  
467 of MCF-7 cells and MDA-MB-231 cells migrating on nanopillar arrays over time and the  
468 fluorescent images showing deformation patterns of cells at the last time point. Scale bars for left  
469 figures, 50  $\mu\text{m}$ . Scale bars for right figures, 10  $\mu\text{m}$ . **(E)** Migration trajectories of cells showing  
470 different nuclear deformation patterns on nanopillars (Ring: N= 35 cells; Line: N= 42 cells). **(F)**  
471 MSD measurement of cells showing different nuclear deformation patterns. **(G)** Comparison of  
472 migration rate of cells showing varying nuclear deformation patterns. **(H)** Migration trajectories  
473 of MCF-7 cells showing different nuclear deformation patterns on nanopillars (MCF7 ring: N= 28  
474 cells; MCF7 line: N= 12 cells). Two blue circles with the same diameter are centered with the  
475 origin to show that MCF-7 cells with line deformation on nanopillars tend to migrate faster than  
476 those showing ring deformation. **(I)** MSD measurement of MCF-7 cells showing different nuclear  
477 deformation patterns. **(J)** Comparison of migration rate of MCF-7 cells showing varying nuclear  
478 deformation patterns. Statistical significance of migration rate measurement under different  
479 conditions was evaluated by an unpaired t-test with Welch's correction. \*\*\*\*P < 0.0001; \*\*P <  
480 0.01



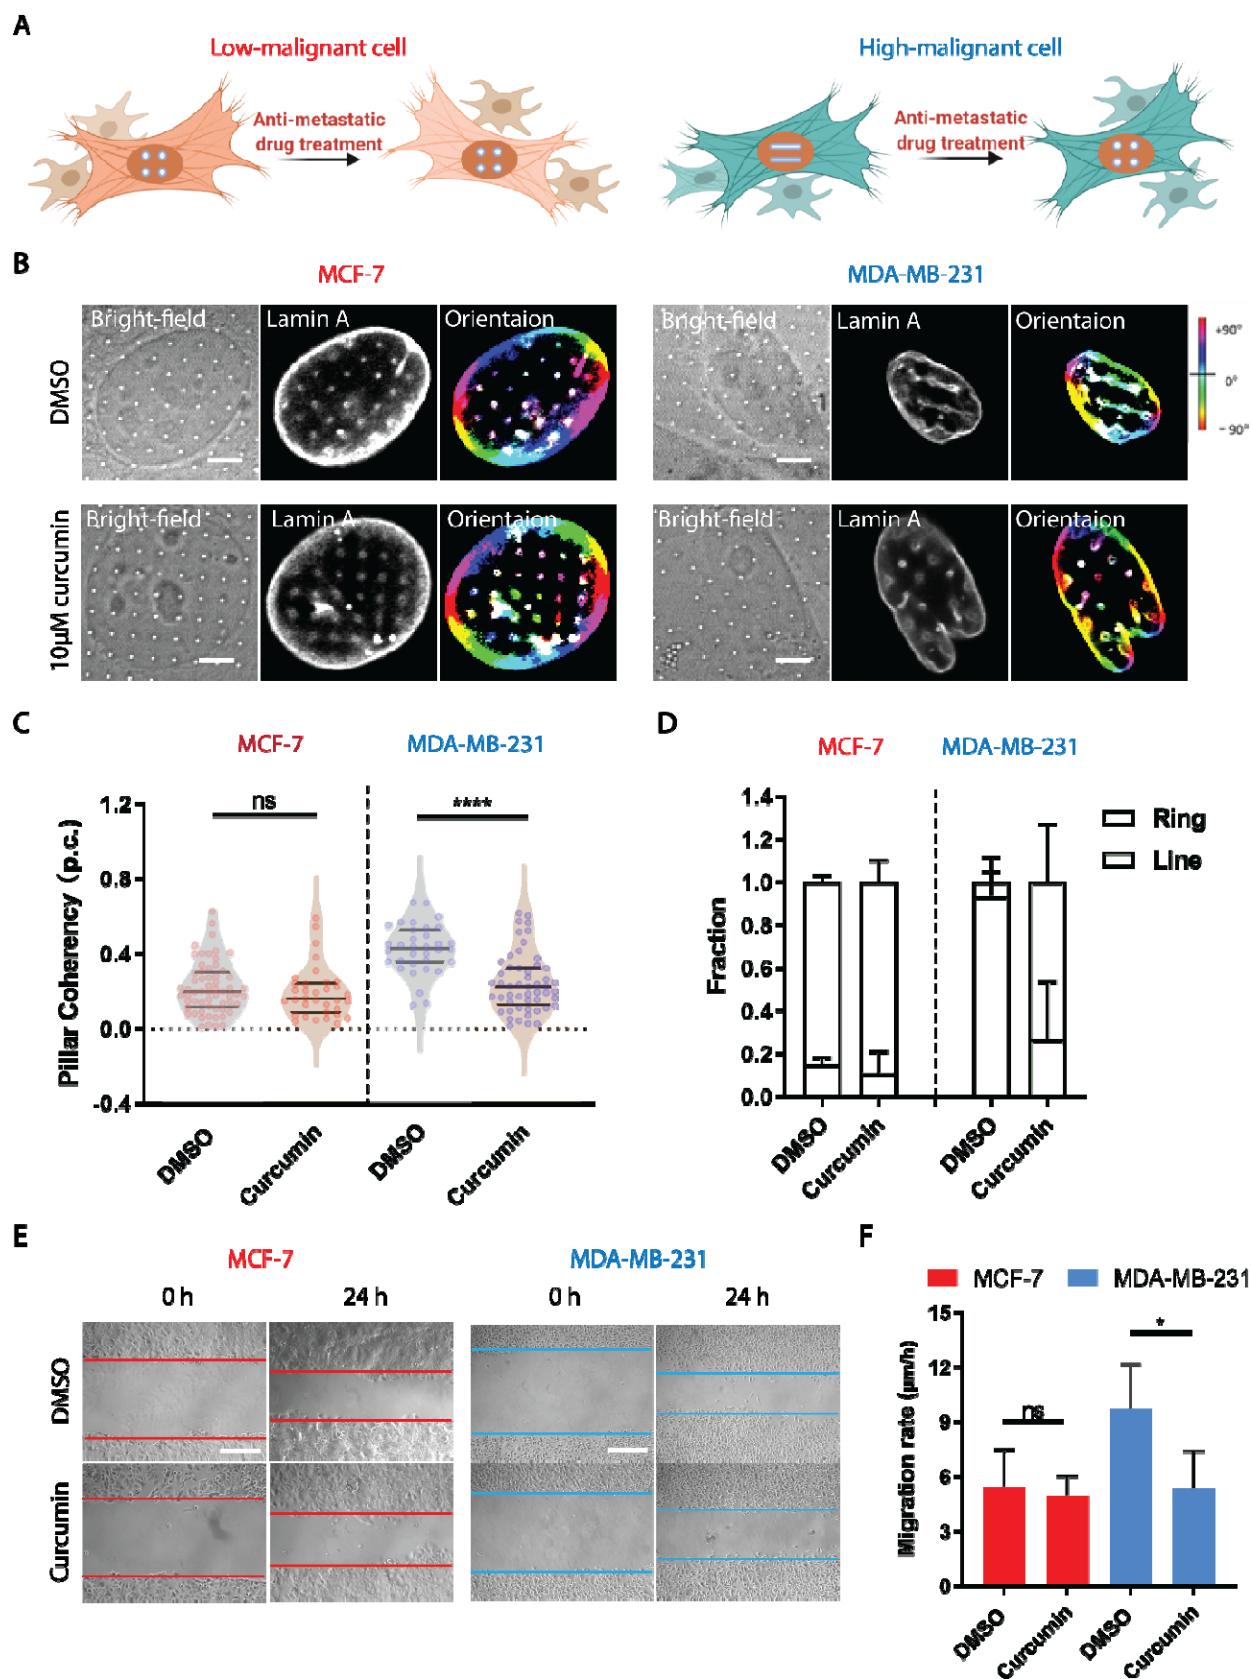

481  
482 **Figure 3. Evaluating anti-metastatic drug effects via nanopillar-induced subnuclear**  
483 **deformation.** (A) Characterize response of cancer cells with varying malignancies to  
484 anti-metastatic drug treatment using deformation anisotropy. (B) Nuclear deformation patterns  
485 and their orientation of MCF-7 cells and MDA-MB-231 cells on nanopillar arrays with or without

486 curcumin treatment. Scale bar, 5  $\mu\text{m}$ . **(C)** Anisotropy measurement of nanopillar-guided nuclear  
487 features in MCF-7 cells and MDA-MB-231 cells with or without curcumin treatment (MCF-7:  
488 N= 61 pillars (DMSO); N= 34 pillars (curcumin); MDA-MB-231: N=34 pillars (DMSO); N=52  
489 pillars (curcumin).). **(D)** Fraction of ring deformation and line deformation in MDA-MB-231 cells  
490 and MCF-7 cells on nanopillar arrays with or without curcumin treatment (MCF-7: N= 35 cells  
491 (DMSO); N= 21 cells (curcumin); MDA-MB-231: N=27 cells (DMSO); N= 30 cells (curcumin).).  
492 Error bars represent SD. **(E)** Wound healing assay of MCF-7 cells and MDA-MB-231 cells with  
493 or without curcumin treatment for 24h. Scale bars, 200  $\mu\text{m}$ . **(F)** Migration rate of MCF-7 cells and  
494 MDA-MB-231 cells under different conditions was measured using wound healing assay (N= 3  
495 batches). Statistical significance of measurement for coherency and migration rate under different  
496 conditions was evaluated by an unpaired t-test with Welch's correction. \*\*\*\*P < 0.0001; \*P <  
497 0.05; ns > 0.05.

498  
499  
500
